# Supplementary material
Source: Springer Nature journal article supplement (https://www.springermedizin.de/resource/supplementary/12889_2011_4235_MOESM1_ESM.pdf/9491392)

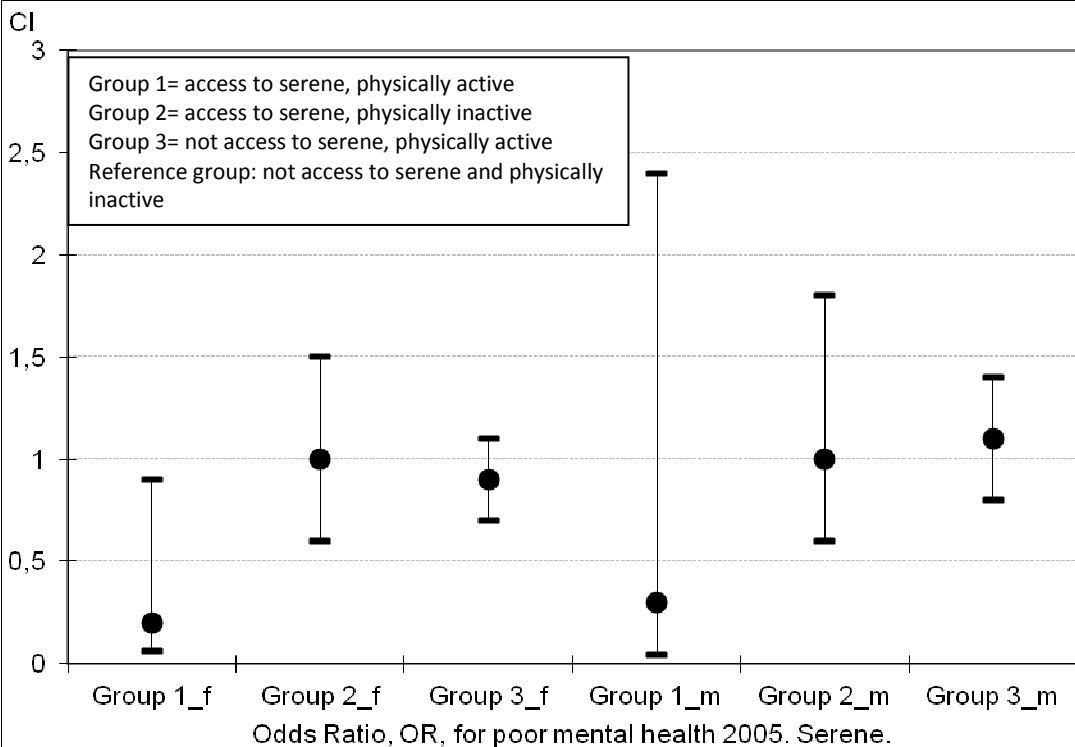

Supplement: MOESM1 [file 9491392]
